# Supplementary material for: Lipoprotein Proteomics and Aortic Valve Transcriptomics Identify Biological Pathways Linking Lipoprotein(a) Levels to Aortic Stenosis
Source: MDPI journal article supplement (doi:10.3390/metabo11070459), 2021-07-16
Supplement: s1 [file s1]

## SUPPLEMENTARY MATERIAL

### **Lipoprotein Proteomics and Aortic Valve Transcriptomics Identify Biological Pathways Linking Lipoprotein(a) levels to Aortic Stenosis**

Raphaëlle Bourgeois<sup>1,2</sup>, Jérôme Bourgault<sup>1,2</sup>, Audrey-Anne Despres<sup>1,2</sup>, Nicolas Perrot<sup>1,2</sup>,  
Jakie Guertin<sup>1,2</sup>, Arnaud Girard<sup>1,2</sup>, Patricia L. Mitchell<sup>1</sup>, Clarisse Gotti<sup>3</sup>,  
Sylvie Bourassa<sup>3</sup>, Corey A Scipione<sup>4</sup>, Nathalie Gaudreault<sup>1</sup>, Michael B Boffa<sup>5</sup>,  
Marlys L. Koschinsky<sup>5</sup>, Philippe Pibarot<sup>1,2</sup>, Arnaud Droit<sup>3,6</sup>, Sébastien Thériault<sup>1,7</sup>,  
Patrick Mathieu<sup>1,8</sup>, Yohan Bosse<sup>1,9</sup> and Benoit J Arsenault<sup>\*1,2</sup>

- 1) Centre de recherche de l'Institut universitaire de cardiologie et de pneumologie de Québec, QC, Canada
- 2) Department of Medicine, Faculty of Medicine, Université Laval, Québec, QC, Canada
- 3) Proteomics platform of the CHU de Québec, QC, Canada
- 4) Toronto General Research Institute, University Health Network, ON, Canada
- 5) Robarts Research Institute, London, ON, Canada
- 6) Centre de recherche du CHU de Québec, QC, Canada
- 7) Department of Molecular Biology, Medical Biochemistry and Pathology, Faculty of Medicine, Université Laval, Québec, Québec, Canada.
- 8) Department of Surgery, Faculty of Medicine, Université Laval, Québec, QC, Canada
- 9) Department of Molecular Medicine, Faculty of Medicine, Université Laval, Québec, Québec, Canada.

**Figure S1.** Molecular Complex Detection (MCODE) algorithm network performed for the top genes influenced by Lp(a) levels. MCODE algorithm detects densely connected regions in large protein-protein interaction networks that may represent molecular complexes. MCODE details are represented in supplementary Table 3.

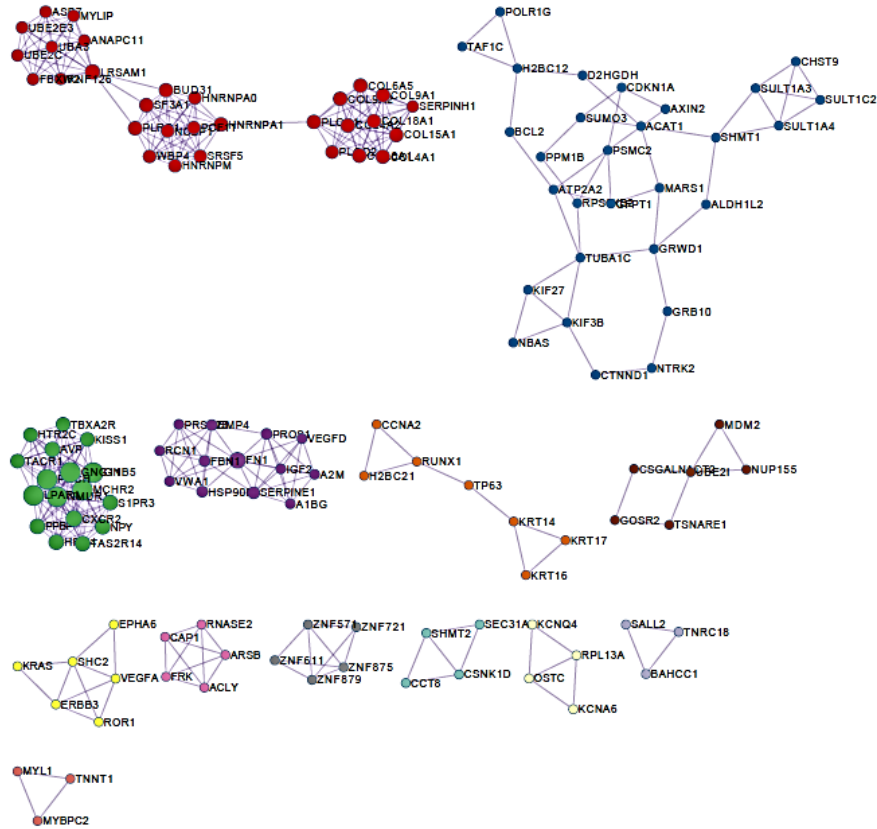

**Table S1:** Characterisation of the proteins found on Lp(a) particles regardless of CAVS status according to their relative abundance

| Gene              | Protein                                      | Mean signal |
|-------------------|----------------------------------------------|-------------|
| APOB              | Apolipoprotein B-100;Apolipoprotein B-48     | 3,76E+11    |
| LPA               | Apolipoprotein(a)                            | 6,85E+10    |
| APOA1             | Apolipoprotein A-I                           | 1,40E+10    |
| SERPING1          | Plasma protease C1 inhibitor                 | 1,04E+10    |
| APOE              | Apolipoprotein E                             | 7,40E+09    |
| APOC3             | Apolipoprotein C-III                         | 4,99E+09    |
| A0A0U1RR20        |                                              | 4,53E+09    |
| CLU               | Clusterin                                    | 2,90E+09    |
| APOA4             | Apolipoprotein A-IV                          | 2,16E+09    |
| HP                | Haptoglobin                                  | 1,93E+09    |
| SERPINA1          | Alpha-1-antitrypsin                          | 1,82E+09    |
| PON1              | Serum paraoxonase/arylesterase 1             | 1,54E+09    |
| HBB               | Hemoglobin subunit beta                      | 1,22E+09    |
| IGHA1             | Ig alpha-1 chain C region                    | 1,15E+09    |
| APOA2             | Apolipoprotein A-II                          | 8,66E+08    |
| TTR               | Transthyretin                                | 8,58E+08    |
| APOD              | Apolipoprotein D                             | 7,62E+08    |
| SERPINA3          | Alpha-1-antichymotrypsin                     | 7,14E+08    |
| C3                | Complement C3                                | 6,46E+08    |
| KNG1              | Kininogen-1                                  | 5,64E+08    |
| APOC1             | Apolipoprotein C-I                           | 5,16E+08    |
| IGKC              | Ig kappa chain C region                      | 5,15E+08    |
| F2                | Prothrombin                                  | 5,00E+08    |
| HBA1;HBA2         | Hemoglobin subunit alpha                     | 4,80E+08    |
| APOC4-APOC2;APOC2 | Apolipoprotein C-II                          | 4,69E+08    |
| C4A               | Complement C4-A                              | 4,52E+08    |
| VTN               | Vitronectin                                  | 4,18E+08    |
| APOF              | Apolipoprotein F                             | 4,15E+08    |
| ITIH2             | Inter-alpha-trypsin inhibitor heavy chain H2 | 4,01E+08    |
| AMBP              | Protein AMBP                                 | 3,98E+08    |
| ORM1              | Alpha-1-acid glycoprotein 1                  | 3,50E+08    |
| IGHM              | Ig mu chain C region                         | 3,49E+08    |
| ITIH3             | Inter-alpha-trypsin inhibitor heavy chain H3 | 3,42E+08    |
| SERPINC1          | Antithrombin-III                             | 3,37E+08    |
| ITIH1             | Inter-alpha-trypsin inhibitor heavy chain H1 | 3,16E+08    |
| IGHG1             | Ig gamma-1 chain C region                    | 2,97E+08    |
| GP1BA             | Platelet glycoprotein Ib alpha chain         | 2,96E+08    |
| F5                | Coagulation factor V                         | 2,81E+08    |
| PCYOX1            | Prenylcysteine oxidase 1                     | 2,58E+08    |

|                |                                                                          |          |
|----------------|--------------------------------------------------------------------------|----------|
| FLNA           | Filamin-A                                                                | 2,45E+08 |
| ACTB;ACTG1     | Actin, cytoplasmic 1;Actin, cytoplasmic 1, N-terminally processed        | 2,26E+08 |
| A2M            | Alpha-2-macroglobulin                                                    | 2,25E+08 |
| PLTP           | Phospholipid transfer protein                                            | 2,23E+08 |
| IGLL5;IGLC1    | Immunoglobulin lambda-like polypeptide 5;Ig lambda-1 chain C regions     | 2,21E+08 |
| HEG1           | Protein HEG homolog 1                                                    | 2,16E+08 |
| PODXL          | Podocalyxin                                                              | 2,16E+08 |
| GOLM1          | Golgi membrane protein 1                                                 | 2,11E+08 |
| APOM           | Apolipoprotein M                                                         | 2,09E+08 |
| PI16           | Peptidase inhibitor 16                                                   | 1,99E+08 |
| SPARCL1        | SPARC-like protein 1                                                     | 1,97E+08 |
| A0A2R8Y4Z1     |                                                                          | 1,74E+08 |
| CFH            | Complement factor H                                                      | 1,54E+08 |
| SSC5D          | Soluble scavenger receptor cysteine-rich domain-containing protein SSC5D | 1,46E+08 |
| FN1            | Fibronectin                                                              | 1,32E+08 |
| PTPRG          | Receptor-type tyrosine-protein phosphatase gamma                         | 1,31E+08 |
| CD44           | CD44 antigen                                                             | 1,30E+08 |
| SAA2-SAA4;SAA4 | Serum amyloid A-4 protein                                                | 1,29E+08 |
| LBP            | Lipopolysaccharide-binding protein                                       | 1,28E+08 |
| ORM2           | Alpha-1-acid glycoprotein 2                                              | 1,22E+08 |
| ABI3BP         | Target of Nesh-SH3                                                       | 1,17E+08 |
| AGT            | Angiotensinogen                                                          | 1,07E+08 |
| CENPF          | Centromere protein F                                                     | 1,03E+08 |
| A1BG           | Alpha-1B-glycoprotein                                                    | 9,80E+07 |
| ITGA2B         | Integrin alpha-Iib                                                       | 9,31E+07 |
| HPR            | Haptoglobin-related protein                                              | 8,92E+07 |
| TF             | Serotransferrin                                                          | 8,80E+07 |
| IGHG2          | Ig gamma-2 chain C region                                                | 8,68E+07 |
| AHSG           | Alpha-2-HS-glycoprotein                                                  | 7,90E+07 |
| TLN1           | Talin-1                                                                  | 7,59E+07 |
| MENT           | Protein MENT                                                             | 7,15E+07 |
| APOC4          | Apolipoprotein C-IV                                                      | 6,87E+07 |
| PLA2G7         | Platelet-activating factor acetylhydrolase                               | 6,53E+07 |
| HSPA5          | 78 kDa glucose-regulated protein                                         | 6,30E+07 |
| COL18A1        | Collagen alpha-1(XVIII) chain                                            | 6,24E+07 |
| PTPRJ          | Receptor-type tyrosine-protein phosphatase                               | 5,63E+07 |
| AKAP12         | A-kinase anchor protein 12                                               | 5,41E+07 |
| C9             | Complement component C9                                                  | 5,35E+07 |
| SERPINF2       | Alpha-2-antiplasmin                                                      | 5,12E+07 |
| YWHAZ          | 14-3-3 protein zeta/delta                                                | 5,09E+07 |

|            |                                                 |          |
|------------|-------------------------------------------------|----------|
| TNC        | Tenascin                                        | 4,81E+07 |
| SERPIND1   | Heparin cofactor 2                              | 4,53E+07 |
| VCAM1      | Vascular cell adhesion protein 1                | 4,42E+07 |
| ITIH4      | Inter-alpha-trypsin inhibitor heavy chain H4    | 4,35E+07 |
| APOL1      | Apolipoprotein L1                               | 4,28E+07 |
| SELL       | L-selectin                                      | 3,89E+07 |
| CPN2       | Carboxypeptidase N subunit 2                    | 3,61E+07 |
| C4BPA      | C4b-binding protein alpha chain                 | 3,54E+07 |
| ITGB3      | Integrin beta-3                                 | 3,45E+07 |
| JCHAIN;IGJ | Immunoglobulin J chain                          | 3,43E+07 |
| C1S        | Complement C1s subcomponent                     | 3,34E+07 |
| TNXB       | Tenascin-X                                      | 3,29E+07 |
| SERPINA1   | Alpha-I-antitrypsin                             | 3,21E+07 |
| PTPRZ1     | Receptor-type tyrosine-protein phosphatase zeta | 3,18E+07 |
| GC         | Vitamin D-binding protein                       | 3,15E+07 |
| DCD        | Dermcidin                                       | 3,13E+07 |
| TTN        | Titin                                           | 2,99E+07 |
| MUC1       | Mucin-1                                         | 2,98E+07 |
| C1R        | Complement C1r subcomponent                     | 2,93E+07 |
| S100A9     | Protein S100-A9                                 | 2,87E+07 |
| HRG        | Histidine-rich glycoprotein                     | 2,73E+07 |
| VCAN       | Versican core protein                           | 2,71E+07 |
| A0A140TA44 |                                                 | 2,71E+07 |
| NCAM1      | Neural cell adhesion molecule 1                 | 2,70E+07 |
| CP         | Ceruloplasmin                                   | 2,51E+07 |
| P01619     | Ig kappa chain V-III region B6                  | 2,50E+07 |
| CHL1       | Neural cell adhesion molecule L1-like protein   | 2,42E+07 |
| PON3       | Serum paraoxonase/lactonase 3                   | 2,31E+07 |
| LCAT       | Phosphatidylcholine-sterol acyltransferase      | 2,30E+07 |
| HPX        | Hemopexin                                       | 2,26E+07 |
| A0A2Q2TTZ9 | Ig kappa chain V-I region                       | 2,18E+07 |
| GPR126     | G-protein coupled receptor 126                  | 2,08E+07 |
| PROS1      | Vitamin K-dependent protein S                   | 1,95E+07 |
| AFM        | Afamin                                          | 1,88E+07 |
| NUCB1      | Nucleobindin-1                                  | 1,88E+07 |
| ITGB1      | Integrin beta-1                                 | 1,86E+07 |
| S100A8     | Protein S100-A8                                 | 1,86E+07 |
| CD9        | CD9 antigen                                     | 1,85E+07 |
| STOM       | Erythrocyte band 7 integral membrane protein    | 1,84E+07 |
| ACTN1      | Alpha-actinin-1                                 | 1,82E+07 |
| ITGA6      | Integrin alpha-6                                | 1,80E+07 |
| GPR116     | Probable G-protein coupled receptor 116         | 1,80E+07 |
| SELP       | P-selectin                                      | 1,76E+07 |

|                      |                                                                                                       |          |
|----------------------|-------------------------------------------------------------------------------------------------------|----------|
| LYVE1                | Lymphatic vessel endothelial hyaluronic acid receptor 1                                               | 1,75E+07 |
| PIP                  | Prolactin-inducible protein                                                                           | 1,74E+07 |
| VASN                 | Vasorin                                                                                               | 1,71E+07 |
| IGHA2                | Ig alpha-2 chain C region                                                                             | 1,71E+07 |
| F10                  | Coagulation factor X                                                                                  | 1,69E+07 |
| VCL                  | Vinculin                                                                                              | 1,68E+07 |
| IGFALS               | Insulin-like growth factor-binding protein complex acid labile subunit                                | 1,68E+07 |
| CD34                 | Hematopoietic progenitor cell antigen CD34                                                            | 1,59E+07 |
| MADCAM1              | Mucosal addressin cell adhesion molecule 1                                                            | 1,57E+07 |
| MCAM                 | Cell surface glycoprotein MUC18                                                                       | 1,52E+07 |
| PTPRC                | Receptor-type tyrosine-protein phosphatase C                                                          | 1,47E+07 |
| MUC20                | Mucin-20                                                                                              | 1,43E+07 |
| IGHG3                | Ig gamma-3 chain C region                                                                             | 1,39E+07 |
| TFPI                 | Tissue factor pathway inhibitor                                                                       | 1,35E+07 |
| LAMP2                | Lysosome-associated membrane glycoprotein 2                                                           | 1,30E+07 |
| SYNE1                | Nesprin-1                                                                                             | 1,29E+07 |
| CPN1                 | Carboxypeptidase N catalytic chain                                                                    | 1,29E+07 |
| SEPP1                | Selenoprotein P                                                                                       | 1,27E+07 |
| CD248                | Endosialin                                                                                            | 1,25E+07 |
| HLA-A                | HLA class I histocompatibility antigen, A-24 alpha chain                                              | 1,23E+07 |
| F13A1                | Coagulation factor XIII A chain                                                                       | 1,20E+07 |
| SPN                  | Leukosialin                                                                                           | 1,17E+07 |
| PGLYRP2              | N-acetylmuramoyl-L-alanine amidase                                                                    | 1,12E+07 |
| C5                   | Complement C5                                                                                         | 1,12E+07 |
| FERMT3               | Fermitin family homolog 3                                                                             | 1,10E+07 |
| SERPINA10            | Protein Z-dependent protease inhibitor                                                                | 1,08E+07 |
| UBC;UBB;RPS27A;UBA52 | Ubiquitin; Polyubiquitin-C; Ubiquitin-40S ribosomal protein S27a; Ubiquitin-60S ribosomal protein L40 | 9,51E+06 |
| APCS                 | Serum amyloid P-component                                                                             | 9,16E+06 |
| CD36                 | Platelet glycoprotein 4                                                                               | 9,14E+06 |
| P4HB                 | Protein disulfide-isomerase                                                                           | 9,14E+06 |
| IGLV3-9              | Ig lambda chain V-III region LOI                                                                      | 8,79E+06 |
| GPLD1                | Phosphatidylinositol-glycan-specific phospholipase D                                                  | 8,77E+06 |
| FBLN1                | Fibulin-1                                                                                             | 8,40E+06 |
| AZGP1                | Zinc-alpha-2-glycoprotein                                                                             | 8,12E+06 |
| C1RL                 | Complement C1r subcomponent-like protein                                                              | 7,80E+06 |
| IGKV2D-30            | Ig kappa chain V-II region RPMI 6410                                                                  | 7,34E+06 |
| BASP1                | Brain acid soluble protein 1                                                                          | 7,28E+06 |
| SERPINA6             | Corticosteroid-binding globulin                                                                       | 6,88E+06 |

|          |                                                         |          |
|----------|---------------------------------------------------------|----------|
| CETP     | Cholesteryl ester transfer protein                      | 6,79E+06 |
| APOH     | Beta-2-glycoprotein 1                                   | 6,66E+06 |
| ANPEP    | Aminopeptidase N                                        | 6,57E+06 |
| B2M      | Beta-2-microglobulin                                    | 6,50E+06 |
| MXRA5    | Matrix-remodeling-associated protein 5                  | 5,56E+06 |
| LGALS3BP | Galectin-3-binding protein                              | 3,78E+06 |
| MEGF9    | Multiple epidermal growth factor-like domains protein 9 | 3,61E+06 |
| PARVB    | Beta-parvin                                             | 3,36E+06 |
| CAMP     | Cathelicidin antimicrobial peptide                      | 3,34E+06 |
| MANSC1   | MANSC domain-containing protein 1                       | 2,96E+06 |
| SUSD5    | Sushi domain-containing protein 5                       | 2,65E+06 |
| CRTAC1   | Cartilage acidic protein 1                              | 2,46E+06 |

**Table S2:** Top 10 genes influenced by Lp(a) levels

| <b>LogFC<br/>high minus<br/>low Lp(a)</b> | <b>Average<br/>Expression</b> | <b>T</b> | <b>p-value</b> | <b>p-value<br/>FDR</b> | <b>B</b> | <b>Gene</b> | <b>Chromosome</b> |
|-------------------------------------------|-------------------------------|----------|----------------|------------------------|----------|-------------|-------------------|
| <b>-0,1081</b>                            | 6,5926                        | -4,9045  | 2,943E-06      | 0,0696                 | 4,342    | SERPINB9    | chr6              |
| <b>-0,1390</b>                            | 7,0563                        | -4,3916  | 2,423E-05      | 0,2594                 | 2,442    | ADAMTSL5    | chr19             |
| <b>-0,1614</b>                            | 7,0877                        | -4,3112  | 3,327E-05      | 0,2594                 | 2,157    | SGTB        | chr5              |
| <b>0,1756</b>                             | 6,6305                        | 4,2696   | 3,914E-05      | 0,2594                 | 2,011    | NANOS1      | chr10             |
| <b>-0,1233</b>                            | 8,1592                        | -4,2251  | 4,652E-05      | 0,2594                 | 1,856    | PVR         | chr19             |
| <b>0,0988</b>                             | 6,0877                        | 4,1890   | 5,347E-05      | 0,2594                 | 1,732    | PNMT        | chr17             |
| <b>-0,0834</b>                            | 6,1023                        | -4,1477  | 6,262E-05      | 0,2594                 | 1,590    | VWDE        | chr7              |
| <b>-0,1233</b>                            | 10,6033                       | -4,1241  | 6,854E-05      | 0,2594                 | 1,509    | EHD1        | chr11             |
| <b>0,0929</b>                             | 6,3793                        | 4,0159   | 1,031E-04      | 0,3142                 | 1,145    | ZFP62       | chr5              |
| <b>-0,1371</b>                            | 6,9186                        | -3,9799  | 1,179E-04      | 0,3142                 | 1,025    | RASD2       | chr22             |



**Table S3:** Pathways description and log10(p) from the MCODE algorithm analysis of the top genes identified in the transcriptomic stud.

| Color                                                                               | MCODE   | GO            | Description                                                                                                                 | Log10(P) |
|-------------------------------------------------------------------------------------|---------|---------------|-----------------------------------------------------------------------------------------------------------------------------|----------|
|    | MCODE_1 | R-HSA-1650814 | Collagen biosynthesis and modifying enzymes                                                                                 | -21.5    |
|                                                                                     | MCODE_1 | R-HSA-1474290 | Collagen formation                                                                                                          | -20.0    |
|                                                                                     | MCODE_1 | R-HSA-8948216 | Collagen chain trimerization                                                                                                | -16.0    |
|    | MCODE_2 | R-HSA-156584  | Cytosolic sulfonation of small molecules                                                                                    | -5.7     |
|                                                                                     | MCODE_2 | GO:0051923    | sulfation                                                                                                                   | -5.7     |
|                                                                                     | MCODE_2 | GO:0034035    | purine ribonucleoside bisphosphate metabolic process                                                                        | -5.7     |
|    | MCODE_3 | R-HSA-500792  | GPCR ligand binding                                                                                                         | -30.4    |
|                                                                                     | MCODE_3 | R-HSA-373076  | Class A/1 (Rhodopsin-like receptors)                                                                                        | -24.2    |
|                                                                                     | MCODE_3 | R-HSA-416476  | G alpha (q) signalling events                                                                                               | -19.3    |
|   | MCODE_4 | R-HSA-381426  | Regulation of Insulin-like Growth Factor (IGF) transport and uptake by Insulin-like Growth Factor Binding Proteins (IGFBPs) | -15.8    |
|                                                                                     | MCODE_4 | R-HSA-8957275 | Post-translational protein phosphorylation                                                                                  | -13.8    |
|                                                                                     | MCODE_4 | GO:0002576    | platelet degranulation                                                                                                      | -13.2    |
|  | MCODE_5 | GO:0030216    | keratinocyte differentiation                                                                                                | -8.5     |
|                                                                                     | MCODE_5 | GO:0042303    | molting cycle                                                                                                               | -8.2     |
|                                                                                     | MCODE_5 | GO:0042633    | hair cycle                                                                                                                  | -8.2     |
|  | MCODE_6 | GO:0033674    | positive regulation of kinase activity                                                                                      | -10.0    |
|                                                                                     | MCODE_6 | GO:0051347    | positive regulation of transferase activity                                                                                 | -9.7     |
|                                                                                     | MCODE_6 | ko01521       | EGFR tyrosine kinase inhibitor resistance                                                                                   | -9.1     |
|  | MCODE_7 | R-HSA-3232142 | SUMOylation of ubiquitinylation proteins                                                                                    | -7.3     |
|                                                                                     | MCODE_7 | GO:0016925    | protein sumoylation                                                                                                         | -6.3     |
|                                                                                     | MCODE_7 | R-HSA-3108232 | SUMO E3 ligases SUMOylate target proteins                                                                                   | -5.3     |

|                                                                                   |          |               |                                                         |      |
|-----------------------------------------------------------------------------------|----------|---------------|---------------------------------------------------------|------|
|  | MCODE_8  | R-HSA-6798695 | Neutrophil degranulation                                | -8.8 |
|                                                                                   | MCODE_8  | GO:0043312    | neutrophil degranulation                                | -8.8 |
|                                                                                   | MCODE_8  | GO:0002283    | neutrophil activation<br>involved in immune<br>response | -8.8 |
|  | MCODE_9  | hsa05168      | Herpes simplex virus 1<br>infection                     | -8.5 |
|  | MCODE_13 | R-HSA-390522  | Striated Muscle<br>Contraction                          | -8.7 |
|                                                                                   | MCODE_13 | WP383         | Striated Muscle<br>Contraction Pathway                  | -8.6 |
|                                                                                   | MCODE_13 | GO:0033275    | actin-myosin filament<br>sliding                        | -8.6 |

---
